# Supplementary material for: Unlocking the biosynthetic regulation role of polyketide alkaloid lydicamycins
Source: Royal Society of Chemistry journal article supplement (doi:10.1039/d3nj05152h), 2023-12-07
Supplement: d3nj05152h1.pdf [file d3nj05152h1.pdf]

ELECTRONIC SUPPLEMENTARY INFORMATION

## Unlocking the biosynthetic regulation role of polyketide alkaloid lydicamycins

Xuanlin Zhan<sup>a,b</sup>, Xiaojie Li<sup>a,b</sup>, Yunyan Zeng<sup>a,b</sup>, Siyan Jiang<sup>a</sup>, Chao Pan<sup>a</sup>, Shiyu Pan<sup>a</sup>, Jiaquan Huang<sup>a\*</sup>, Heqian Zhang<sup>a\*</sup>, Zhiwei Qin<sup>a\*</sup>

<sup>a</sup>Center for Biological Science and Technology, Advanced Institute of Natural Sciences, Beijing Normal University, Zhuhai, Guangdong, 519087, China.

<sup>b</sup>These authors contributed equally to this work

E-mail: [z.qin@bnu.edu.cn](mailto:z.qin@bnu.edu.cn); [zhangheqian@bnu.edu.cn](mailto:zhangheqian@bnu.edu.cn); [jiaquan\\_terry@bnu.edu.cn](mailto:jiaquan_terry@bnu.edu.cn)

### 1. Material and methods

**1a. Generating *Streptomyces ginsengnesis* G7 mutants.** Genomic DNA from *Streptomyces ginsengnesis* G7 was isolated using the Hipure Bacterial DNA Kit (Magen). Fragments necessary for cloning were amplified via PCR using Phanta Max Super-Fidelity DNA Polymerase (Vazyme). The plasmid pIB139 was digested with *Nhe*I restriction enzyme and NEB buffer, following the manufacturer's instructions. Multiple DNA fragments were assembled into the digested vector backbones using the Trelief Seamless Cloning Kit (Tsingke). The final vector was propagated in *E. coli* DH5 $\alpha$ , and recombinants were verified through Sanger sequencing. Conjugation experiments were performed to introduce the final vector into *Streptomyces ginsengnesis* G7, using *E. coli* ET12567/pUZ8002 as previously described<sup>1</sup>. Ex-conjugants were collected from the conjugation plates after incubation for 7 days under apramycin and nalidixic acid overlay. Subsequently, they were transferred to new plates and allowed to grow for an additional 7 days under apramycin selection. Single colonies resulting from this process were replica-plated onto apramycin-containing plates for phenotype screening and mutant verification by PCR.

**1b. Lydicamycin congener analysis.** Cultures of *Streptomyces ginsengnesis* wild-type and mutant strains were cultivated on International Streptomyces Projects 2 (ISP2) agar plates at a temperature of 30 °C. From each plate, three equally sized agar plugs (1 cm<sup>3</sup>) were extracted and vigorously shaken with 500  $\mu$ L of methanol for 5 minutes. Following this, the samples were centrifuged twice at 15,000 rpm for 5 minutes each time. The resulting extracts were subjected to High-Performance Liquid Chromatography (HPLC) analysis using the Agilent 1290 Infinity II system. The following chromatographic method was used throughout this work: Phenomenex

Kinetex C<sub>18</sub> column (100 × 2.1 mm, 100 Å); mobile phase A: water + 0.1% formic acid; mobile phase B: acetonitrile + 0.1% formic acid. Elution gradient: 0–1 min, 20% B; 1–12 min, 20%–100% B; 12–14 min, 100% B; 14–14.1 min, 100%–20% B; 14.1–17 min, 20% B; flow rate 0.3mL/min; injection volume 10 µL.

**1c. Molecular networking analysis.** A molecular network was created using the online workflow (<https://ccms-ucsd.github.io/GNPSDocumentation/>) on the GNPS website (<http://gnps.ucsd.edu>)<sup>2</sup>. The data was filtered by removing all MS/MS fragment ions within +/- 17 Da of the precursor m/z. MS/MS spectra were window filtered by choosing only the top 6 fragment ions in the +/- 50Da window throughout the spectrum. The precursor ion mass tolerance was set to 0.1 Da and a MS/MS fragment ion tolerance of 0.1 Da. A network was then created where edges were filtered to have a cosine score above 0.1 and more than 6 matched peaks. Further, edges between two nodes were kept in the network if and only if each of the nodes appeared in each other's respective top 10 most similar nodes. Finally, the maximum size of a molecular family was set to 100, and the lowest scoring edges were removed from molecular families until the molecular family size was below this threshold. The spectra in the network were then searched against GNPS' spectral libraries. The library spectra were filtered in the same manner as the input data. All matches kept between network spectra and library spectra were required to have a score above 0.7 and at least 6 matched peaks.

## 2. ESI Tables

**ESI Table 1.** Strains, plasmids and primers used in this work.

| Strain name                                        | Description                                                                                                                                                             | Source or Ref.                         |
|----------------------------------------------------|-------------------------------------------------------------------------------------------------------------------------------------------------------------------------|----------------------------------------|
| <i>E. coli</i> ET12567                             | <i>dam- dcm- hsdS-</i>                                                                                                                                                  | [3]                                    |
| <i>E. coli</i> DH5 $\alpha$                        | F– $\phi$ 80 <i>lacZ</i> $\Delta$ M15 $\Delta$ ( <i>lacZYA-argF</i> ) U169 <i>recA1 endA1 hsdR17</i> (rK– mK+) <i>phoA supE44</i> $\lambda$ - <i>thi-1 gyrA96 relA1</i> | Tsingke Biotechnology Co., Ltd., China |
| <i>Streptomyces ginsengensis</i> G7                | Wild-type strain                                                                                                                                                        | This work                              |
| <i>Streptomyces ginsengensis</i> G7_ <i>Alyd67</i> | Mutant stain in which the LuxR regulation gene was deleted.                                                                                                             | [4]                                    |
| <i>Streptomyces ginsengensis</i> G7_ <i>lyd67</i>  | Mutant stain in which the LuxR regulation gene was overexpressed.                                                                                                       | This work                              |
| Plasmids and ePACs                                 | Description                                                                                                                                                             | Source or Ref.                         |
| pIB139                                             | pIB139 is used to overexpress a gene                                                                                                                                    | From Professor Yu Yi                   |
| pUZ8002                                            | Non-transmissible RK2 derivative with a mutation in <i>oriT</i>                                                                                                         | [3]                                    |

| Primer name           | Sequence                                      | Description                  |
|-----------------------|-----------------------------------------------|------------------------------|
| <i>ctg1_1131</i> -fwd | ggttgtaggatccacatatgATGGGTGGCTCAGAGCAGG       | To amplify <i>Lyd11</i> gene |
| <i>ctg1_1131</i> -rev | ctgcccttgctCACGCTCTCTCCGCGGAGGGT              |                              |
| <i>ctg1_1152</i> -fwd | ggttgtaggatccacatatgGTGATCAAGGTTCTCGTCACGGATG | To amplify <i>Lyd32</i> gene |
| <i>ctg1_1152</i> -rev | ctgcccttgctcacGGTGCCAGGCCGGCG                 |                              |
| <i>ctg1_1153</i> -fwd | ggttgtaggatccacatatgGAGCGGGTGAGGCGCGC         | To amplify <i>Lyd33</i> gene |
| <i>ctg1_1153</i> -rev | ctgcccttgctcacCGCCTTGACCTCGAAGGACTTCTTCT      |                              |
| <i>ctg1_1154</i> -fwd | gtgccggttgtaggatccacatatgAGTCCCAAGGCCATGGCCC  | To amplify <i>Lyd34</i> gene |
| <i>ctg1_1154</i> -rev | agctcctgcaccttgctcacGTCGGGCGAGACGGGTGAG       |                              |
| <i>ctg1_1163</i> -fwd | ggttgtaggatccacatatgGTGCCCGCTCCGGAGCAG        | To amplify <i>Lyd43</i> gene |
| <i>ctg1_1163</i> -rev | ctgcccttgctcacCCGGCTGAGGCCGCTCG               |                              |
| <i>ctg1_1184</i> -fwd | ggttgtaggatccacatatgGTGCGTGTTGTCCTCGTAGAGG    | To amplify <i>Lyd64</i> gene |

|                       |                                            |                   |
|-----------------------|--------------------------------------------|-------------------|
| <i>ctg1_1184</i> -rev | ctcgcccttgctcacGTCCAGGTTTCGCGCTGTTC        |                   |
| <i>ctg1_1185</i> -fwd | ggttgtaggatccacatatgTTCGGACGGCACCTGTGG     | To amplify        |
| <i>ctg1_1185</i> -rev | ctcgcccttgctcacCGAGGACAACACGCACGG          | <i>Lyd65</i> gene |
| <i>ctg1_1187</i> -fwd | ggttgtaggatccacatatgGGGTTAGTGGAACGTGACGCGG | To amplify        |
| <i>ctg1_1187</i> -rev | ctcgcccttgctcacGGCGATATCCGCGATGTCCGC       | <i>Lyd67</i> gene |

**ESI Table 2.** The media used in this work.

| Media | Recipe (per litre)                                                | Water     | pH      |
|-------|-------------------------------------------------------------------|-----------|---------|
| LB    | 10 g tryptone<br>5 g yeast extract<br>10 g NaCl<br>+/- 20 g agar  | Deionised | 7.5     |
| MS    | 20 g soy flour<br>20 g mannitol<br>20 g agar                      | Tap       | As made |
| ISP2  | 4 g glucose<br>4 g yeast extract<br>10 g malt extract<br>10g agar | Tap       | 7.2     |

**ESI Table 3.** The antibiotics and concentrations used in this work.

| Antibiotic      | Final concentration used for selection ( $\mu\text{g/ml}$ ) |
|-----------------|-------------------------------------------------------------|
| Apramycin       | 50/25                                                       |
| Chloramphenicol | 25                                                          |
| Nalidixic Acid  | 25                                                          |

### 3. ESI References

1. T. Kiese, M. J. Bibb, M. J. Buttner, K. F. Chater, and D. A. Hopwood, *Practical Streptomyces Genetics*, 2000.
2. M. Wang, et al. *Nat Biotechnol.* 2016, **34**, 828-837.
3. A. C. Jones, B. Gust, A. Kulik, L. Heide, M. J. Buttner and M. J. Bibb, *PLoS ONE*, 2013, **8**, e69319.
4. H. Zhang, X. Li, S. Pan, J. Huang and Z. Qin, *New J. Chem.*, 2023, **47**, 12093-12100.
